# Supplementary material for: Uniform formation of uranium oxide nanocrystals inside ordered mesoporous hosts and their potential applications as oxidative catalysts
Source: Royal Society of Chemistry journal article supplement (doi:10.1039/b204987b), 2002-01-01
Supplement: b204987b.pdf [file b204987b.pdf]

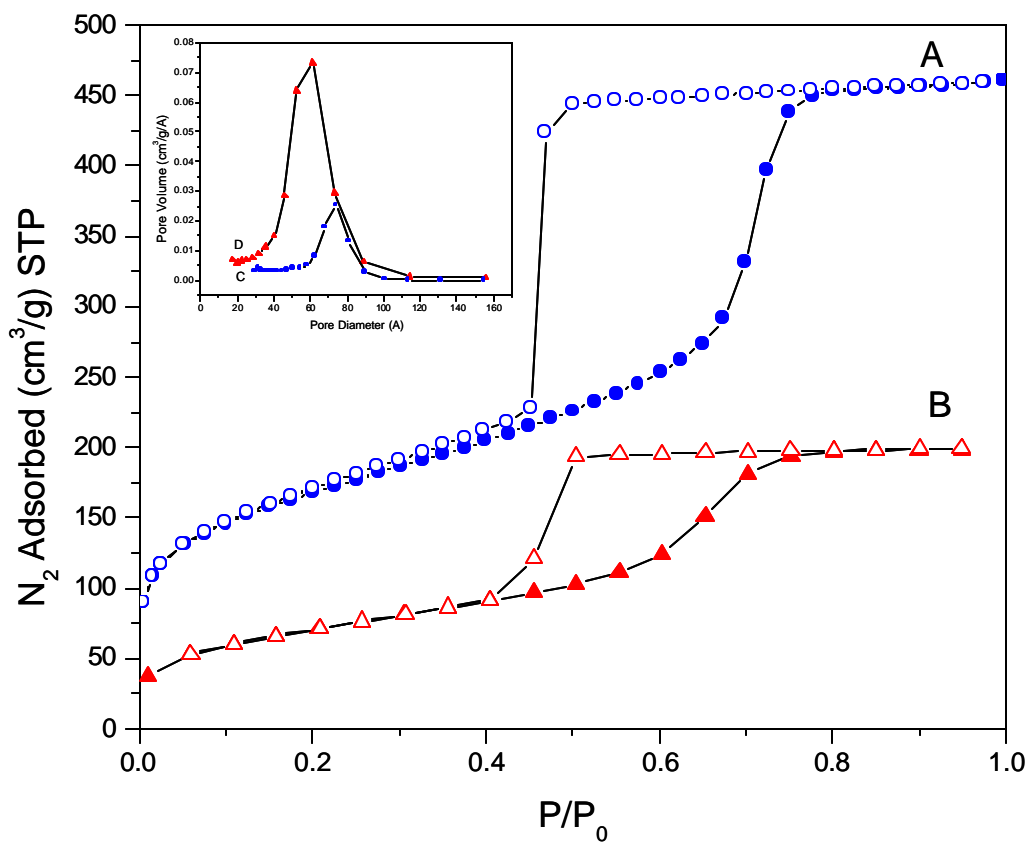

**Figure Caption:** Nitrogen adsorption and desorption isotherms for (A) control blank mesoporous silica and (B)  $U_3O_8$ -incorporated mesoporous silica. Insert: pore distribution of (C) control blank mesoporous silica and (D)  $U_3O_8$ -incorporated mesoporous silica. The surface areas of control blank sample and  $U_3O_8$ -incorporated mesoporous sample are  $568.2 \text{ m}^2/\text{g}$  and  $250 \text{ m}^2 \text{ g}^{-1}$ , respectively.
